# Supplementary material for: The intrinsically disordered Tarp protein from chlamydia binds actin with a partially preformed helix
Source: PubMed Central journal article supplement (PMC5792643; doi:10.1038/s41598-018-20290-8), 2018-01-31
Supplement: 41598_2018_20290_MOESM1_ESM.pdf [file 41598_2018_20290_MOESM1_ESM.pdf]

## Supplementary Information

### The intrinsically disordered Tarp protein from chlamydia binds actin with a partially preformed helix

James Tolchard<sup>1</sup>, Samuel J. Walpole<sup>1</sup>, Andrew J. Miles<sup>2</sup>, Robin Maytum<sup>3</sup>,  
Lawrence A. Eaglen<sup>1</sup>, Ted Hackstadt<sup>4</sup>, B. A. Wallace<sup>2</sup>, Tharin M. A.  
Blumenschein<sup>1</sup>

<sup>1</sup>Center for Molecular and Structural Biology, School of Chemistry, University of East Anglia, Norwich Research Park, Norwich, NR4 7TJ, UK. <sup>2</sup>Institute of Structural and Molecular Biology, Birkbeck College, University of London, London, WC1E 7HX, UK. <sup>3</sup>School of Life Sciences, University of Bedfordshire, Park Square, Luton, LU1 3JU, UK. <sup>4</sup>Host-parasite Interactions Section, Laboratory of Intracellular Parasites, NIAID, NIH, Rocky Mountain Laboratories, Hamilton, MT, 59840, USA. Correspondence and requests for materials should be addressed to T.M.A.B. (email: t.blumenschein@uea.ac.uk)

## Results

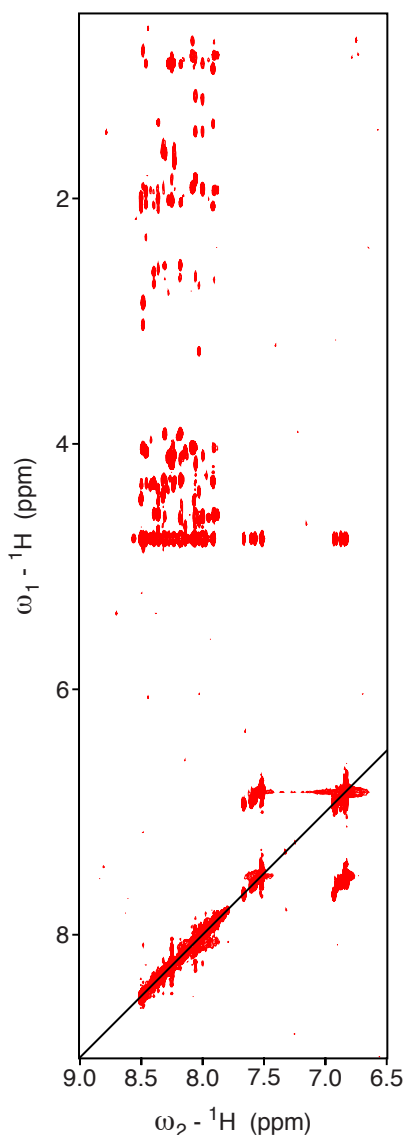

**Figure S1. Two-dimensional  ${}^1\text{H}$ - ${}^1\text{H}$  projection of 3D  $[{}^1\text{H}, {}^{15}\text{N}]$ -HSQC-NOESY.** The spectrum was acquired with a mixing time of 200 ms, at 800 MHz, 298 K. The full  ${}^{15}\text{N}$  spectral width is projected in this image. The few crosspeaks visible correspond to intra-residue correlations. The absence of correlations between amide protons is particularly significant – the only non-diagonal peaks present in the lower half of the spectrum correspond to crosspeaks between two protons in the same glutamine or asparagine side chain.

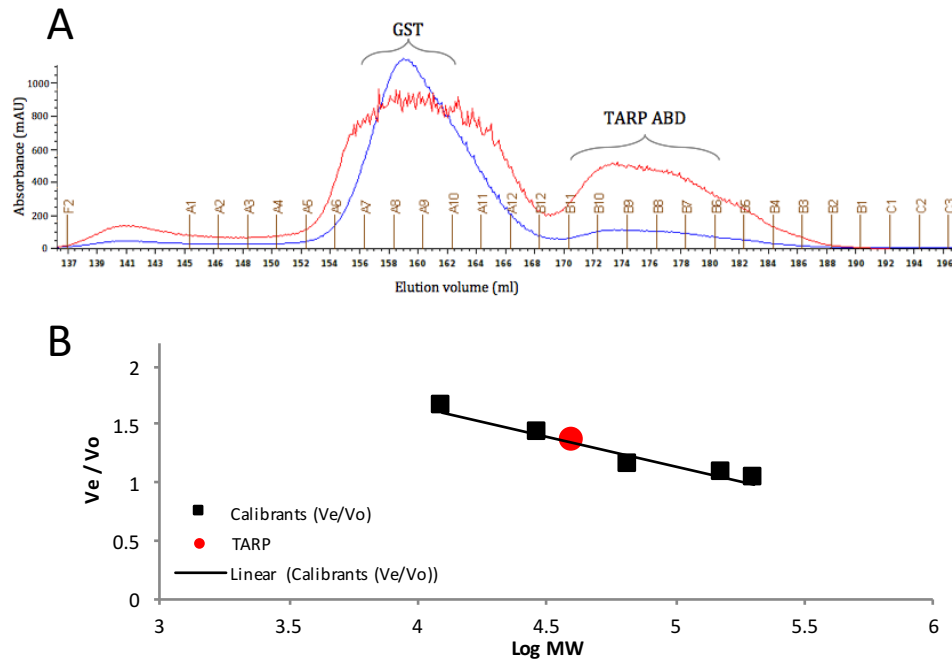

**Figure S2. Size exclusion chromatography of Tarp<sub>726-825</sub>.** (A) Size exclusion chromatogram of a mixture of GST and Tarp<sub>726-825</sub> (after digestion of the GST-Tarp<sub>726-825</sub> fusion protein) in a 75 cm S75 Sephadex column, at 280 nm (blue) and 214 nm (red). (B) Standard protein calibrants (cytochrome *c*, carbonic anhydrase, bovine serum albumin, alcohol dehydrogenase, and  $\beta$ -amylase; black squares) were used to calibrate the S75 column across a molecular weight range of 12.4 kDa to 200 kDa. The relationship between molecular weight (MW), elution volume ( $V_e$ ), and void volume ( $V_o$ ) was used to determine that Tarp<sub>726-825</sub> (red circle) elutes from the column with an apparent molecular weight of  $\sim$  40 kDa.

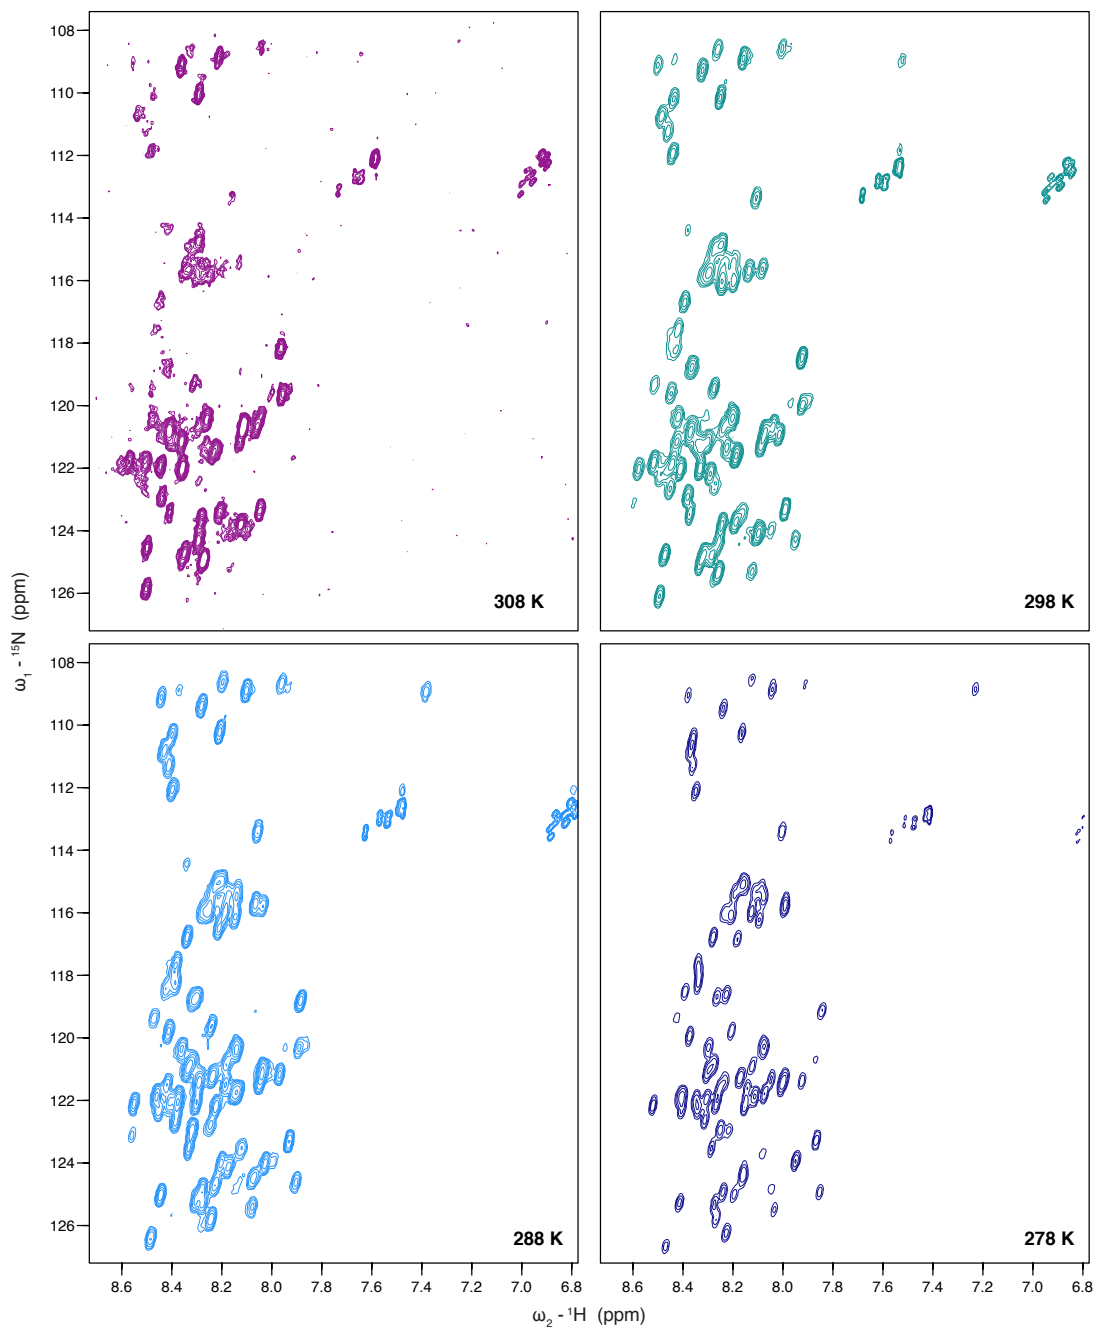

**Figure S3.** [ $^1\text{H}$ ,  $^{15}\text{N}$ ]-HSQC spectra of Tarp<sub>726-825</sub> at varying temperatures. Top left, 308 K; top right, 298 K; bottom left, 288 K, bottom right, 278 K. No new peaks potentially corresponding to residues between 808 and 825 were observed.

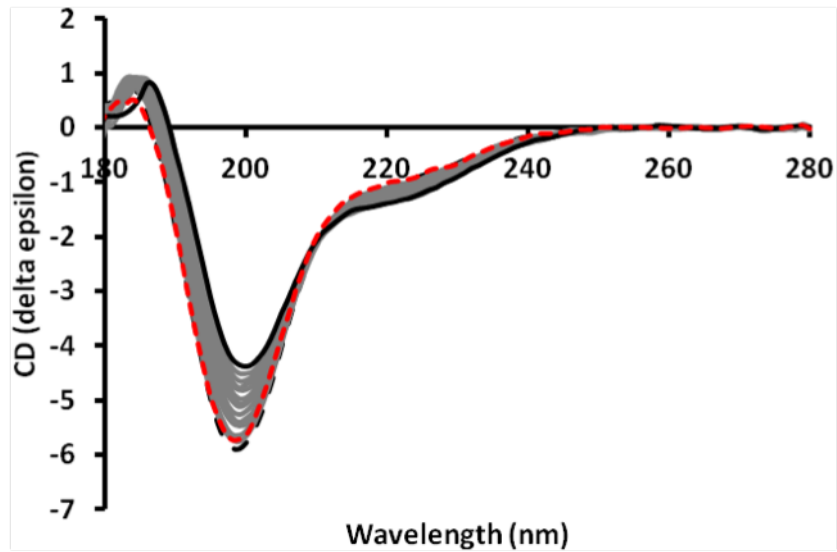

| Secondary Structure | 20 °C (%)  | 85 °C (%)  | $\Delta$ (%) |
|---------------------|------------|------------|--------------|
| $\alpha$ -helix     | 5 $\pm$ 2  | 7 $\pm$ 2  | 2            |
| $\beta$ -strand     | 14 $\pm$ 2 | 19 $\pm$ 2 | 5            |
| Disordered          | 68 $\pm$ 2 | 58 $\pm$ 6 | -10          |

**Figure S4. Thermal melt synchrotron radiation circular dichroism (SRCD) spectroscopy of Tarp<sub>726-825</sub>.** **Top:** SRCD spectra of Tarp<sub>726-825</sub> measured at 20 °C (dashed black line), and in successively increasing 5 °C increments (solid grey lines) up to 85 °C (solid black line), and a final spectrum after return to 20 °C (dashed red line). **Bottom:** The calculated secondary structure content of Tarp at 20 and 85 °C. Values are the average plus or minus standard deviation from three algorithms (as described in Methods).

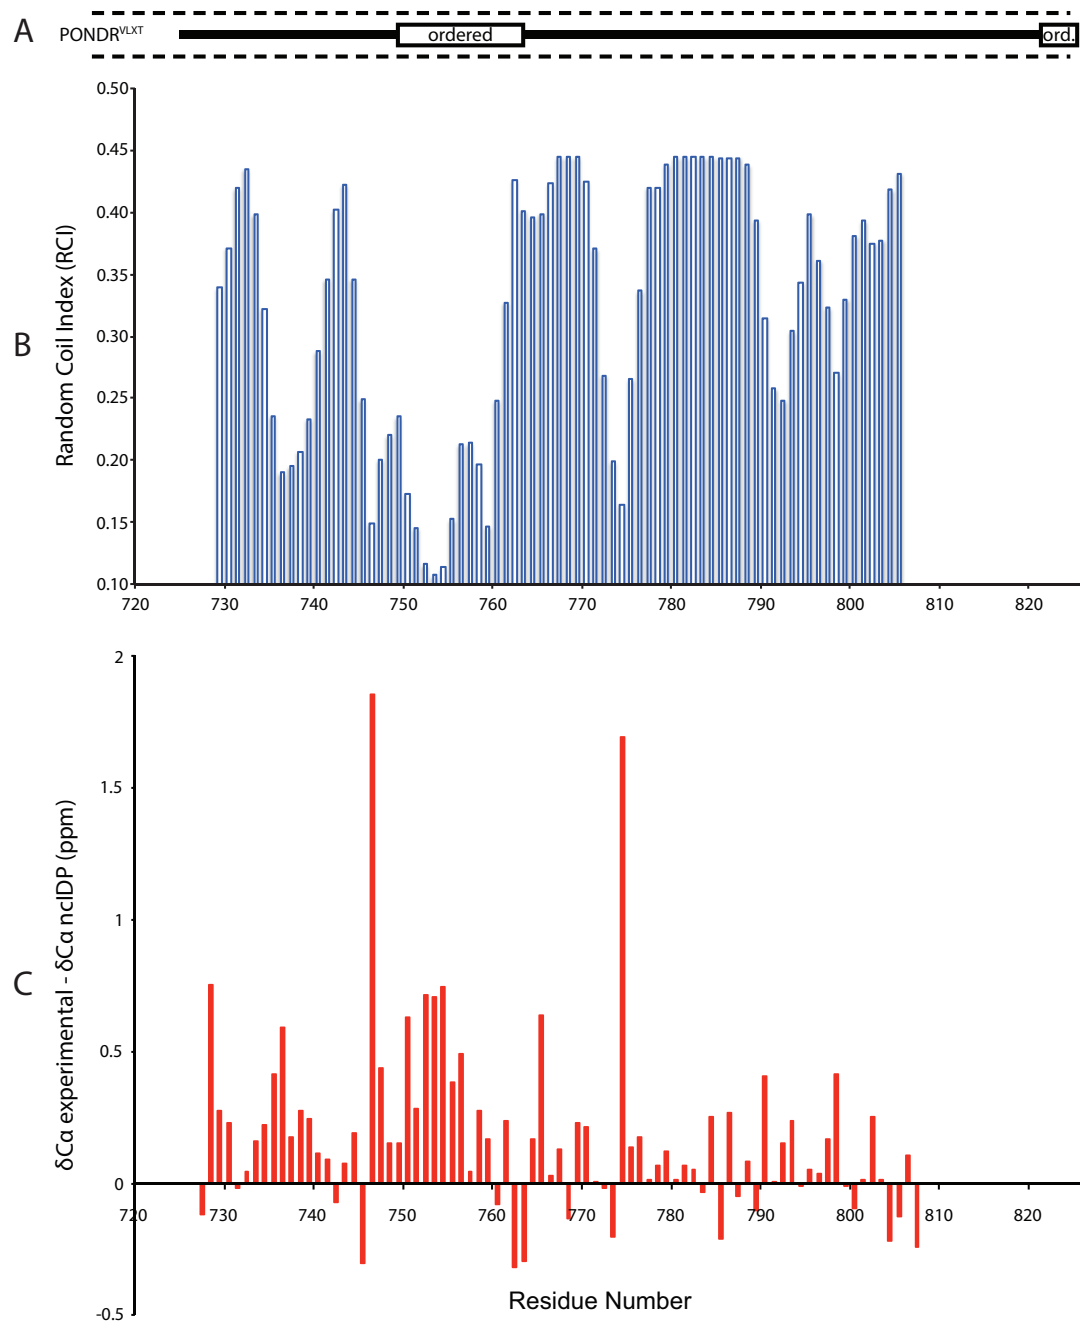

**Figure S5. Order and secondary structure.** (A) PONDRLVLT<sup>1,2</sup> *in silico* disorder prediction (default parameters) for the Tarp<sub>726-825</sub> amino acid sequence. (B) The random coil index value as calculated by the RCI webserver<sup>3</sup> using the Tarp<sub>726-825</sub> backbone chemical shifts with default parameters and Wishart random coil values<sup>4</sup>. (C) Secondary neighbor-corrected C $\alpha$  chemical shifts, calculated using Tamiola *et al.* random coil values for intrinsically disordered proteins<sup>5</sup>.

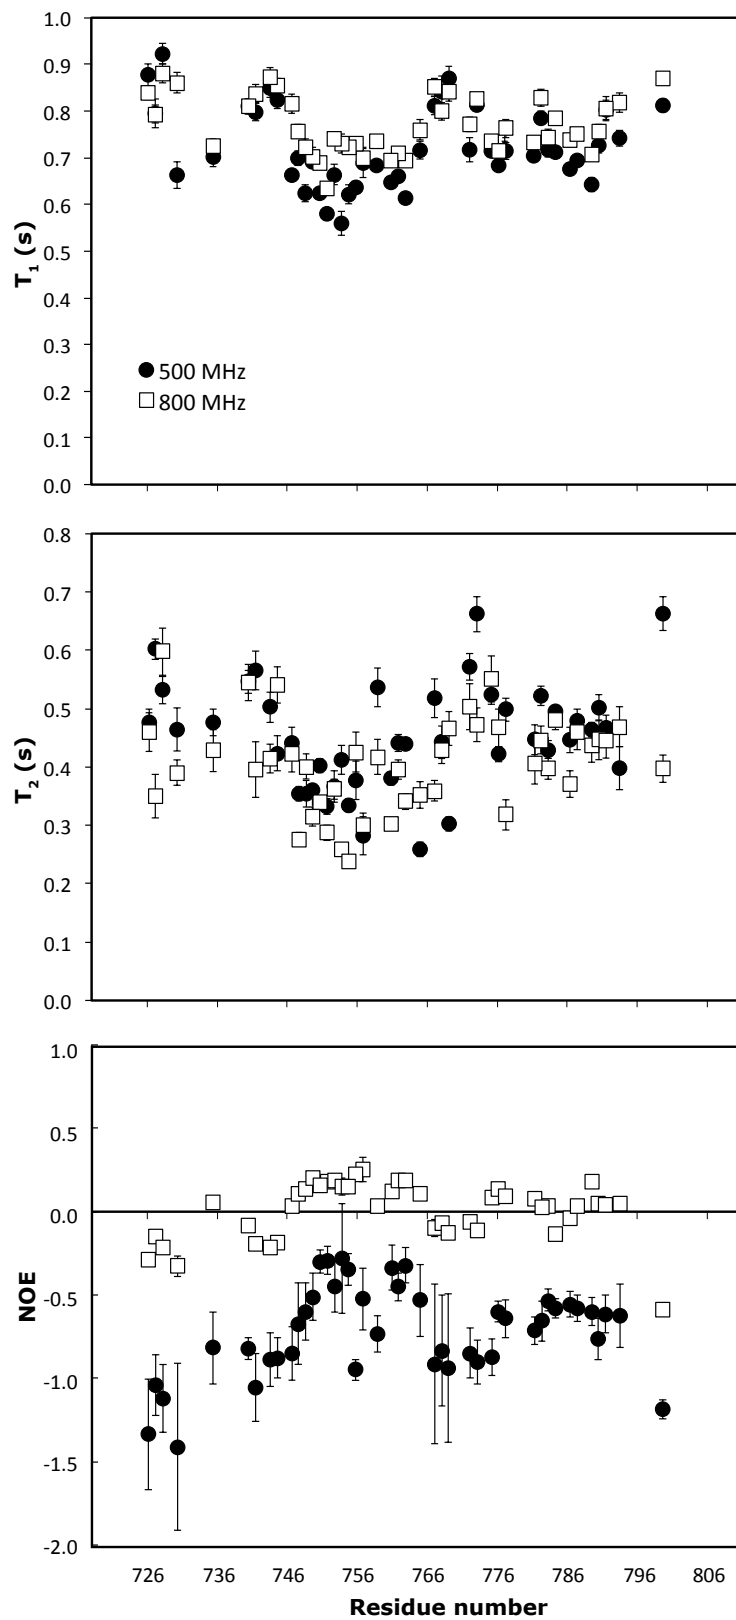

**Figure S6.  $^{15}\text{N}$  relaxation parameters.**  $T_1$ ,  $T_2$  and heteronuclear NOE were measured for Tarp<sub>726-825</sub> at 500 (black circles) and 800 MHz (white squares), at 298 K, in G-actin buffer, pH 7.5. Error bars correspond to the fitting errors for each parameter.

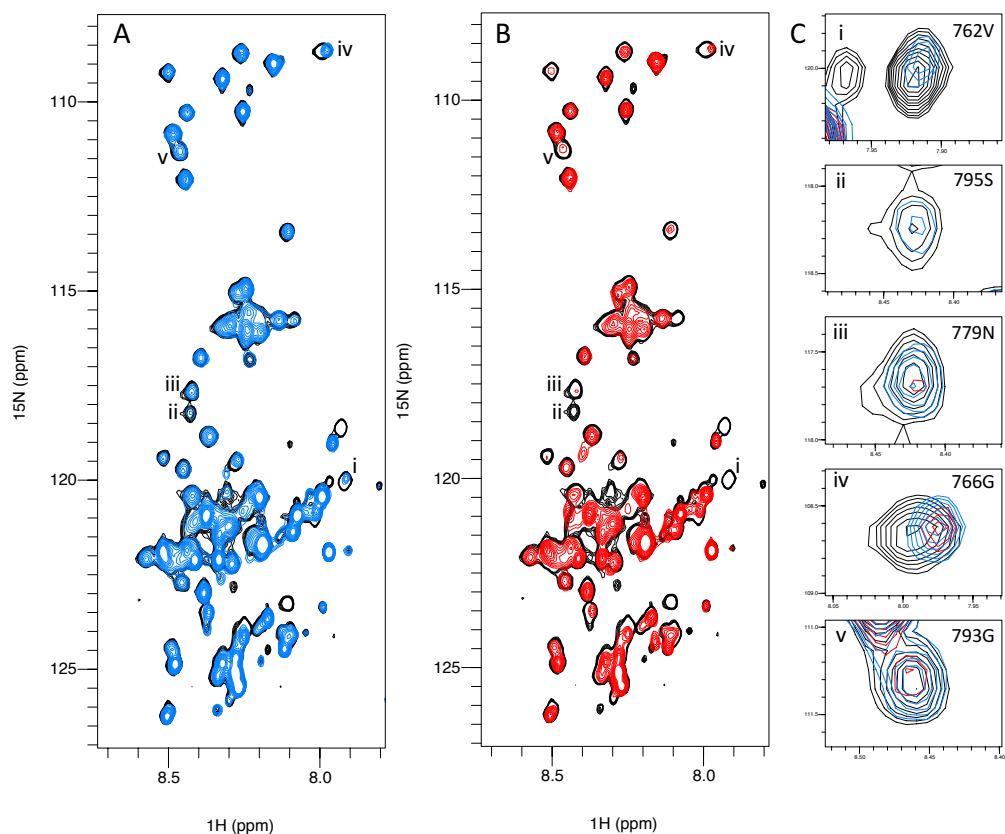

**Figure S7. Binding of Tarp<sub>726-825</sub> to actin observed by NMR spectroscopy.** (A) and (B) The central region of [<sup>1</sup>H-<sup>15</sup>N]-HSQC Tarp<sub>726-825</sub> spectra in the absence of actin (black), in the presence of 0.8:1 actin:Tarp ratio (blue) and of 2:1 actin:Tarp ratio (red). A few examples of peaks with significant decreases in intensity between 0.8:1 and 2:1 actin:Tarp ratios are highlighted with roman numerals. (C) Enlarged view of the peaks highlighted in (A) and (B). Spectra were scaled according to the peak intensity of residues remaining from the fusion tag.

| ITC fitted parameters |                                      |
|-----------------------|--------------------------------------|
| n                     | 1.00 ± 0.06                          |
| K <sub>d</sub>        | 102 ± 33 nM                          |
| ΔH                    | -16.10 ± 0.71 kcal mol <sup>-1</sup> |
| -TΔS                  | 6.56 ± 0.91 kcal mol <sup>-1</sup>   |
| ΔG                    | -9.54 ± 0.21 kcal mol <sup>-1</sup>  |

**Table S1. Tarp:actin binding parameters.** Parameters are shown as average and standard deviation of four independent experiments.

|                                                         | <b>Tarp:actin</b>             | <b>WAVE2:actin</b>            |
|---------------------------------------------------------|-------------------------------|-------------------------------|
| $K_d$ (experimental)                                    | 102 nM                        | 52 nM <sup>6</sup>            |
| $K_d$ <sup>P</sup>                                      | 3.4 $\mu$ M                   | 440 nM                        |
| $\Delta G$ (experimental)                               | -9.54 kcal.mol <sup>-1</sup>  | unknown                       |
| $\Delta G$ <sup>P</sup>                                 | -7.5 kcal.mol <sup>-1</sup>   | -8.7 kcal.mol <sup>-1</sup>   |
| <b>FOLDX<sup>7</sup> Interaction energy</b>             | -12.16 kcal.mol <sup>-1</sup> | -13.98 kcal.mol <sup>-1</sup> |
| <b><u>Interfacial contacts (ICs)</u><sup>P</sup></b>    |                               |                               |
| ICs charged-charged                                     | 2                             | 6                             |
| ICs charged-polar                                       | 3                             | 2                             |
| ICs charged-apolar                                      | 12                            | 16                            |
| ICs polar-polar                                         | 1                             | 0                             |
| ICs polar-apolar                                        | 10                            | 10                            |
| ICs apolar-apolar                                       | 32                            | 21                            |
| <b><u>Non Interacting Surface (NIS)</u><sup>P</sup></b> |                               |                               |
| %NIS charged                                            | 29.68                         | 30.47                         |
| %NIS apolar                                             | 42.05                         | 40.14                         |

**Table S2. Modeled and measured thermodynamic parameters for the Tarp and WAVE2, G-actin interaction.** Parameters denoted <sup>P</sup> were calculated using the PRODIGY webserver<sup>8</sup>.

## References

- Romero, P., Obradovic, Z. & Dunker, A. K. Sequence data analysis for long disordered regions prediction in the calcineurin family. *Genome Inf. Ser Work. Genome Inf.* **8**, 110–124 (1997).
- Li, X., Romero, P., Rani, M., Dunker, A. K. & Obradovic, Z. Predicting protein disorder for N-, C-, and internal regions. *Genome Inf. Ser Work. Genome Inf.* **10**, 30–40 (1999).
- Berjanskii, M. V. & Wishart, D. S. A simple method to predict protein flexibility using secondary chemical shifts. *J. Am. Chem. Soc.* **127**, 14970–14971 (2005).
- Wishart, D. S. & Sykes, B. D. Chemical shifts as a tool for structure determination. *Methods Enzymol.* **239**, 363–392 (1994).
- Tamiola, K., Acar, B. & Mulder, F. A. A. Sequence-specific random coil chemical shifts of intrinsically disordered proteins. *J. Am. Chem. Soc.* **132**, 18000–3 (2010).
- Chereau, D. *et al.* Actin-bound structures of Wiskott-Aldrich syndrome protein (WASP)-homology domain 2 and the implications for filament assembly. *Proc. Natl. Acad. Sci. U. S. A.* **102**, 16644–16649 (2005).
- Schymkowitz, J. *et al.* The FoldX web server: an online force field. *Nucleic Acids Res.* **33**, W382–388 (2005).
- Xue, L. C., Rodrigues, J. P., Kastritis, P. L., Bonvin, A. M. & Vangone, A. PRODIGY: A web server for predicting the binding affinity of protein-protein complexes. *Bioinformatics* **32**, 3676–3678 (2016).
